# Supplementary material for: Demonstration of targeted crossovers in hybrid maize using CRISPR technology
Source: Research Square preprint supplement (doi:10.21203/rs.3.rs-476417/v1), 2021-05-19
Supplement: Supplementary file 1 [file 13f785ba49d0ab98c5fd56ba.xlsx]

## Sheet: Marker_genome_positions
SNP marker	SNP	Parent B	Parent A	SNP genome position	Distance from gRNA1	Distance from gRNA2		gRNA1 -M1/M33
M1	[T/C]	TT	CC	223093185	265859			556068
M2	[G/A]	GG	AA	223220673	138371			gRNA1 -M3/M34
M3	[G/A]	GG	AA	223352541	6503	186137		359011
M4	[C/T]	CC	TT	223356545	2499
M5	[T/A]	TT	AA	223356733	2311
M6	[C/G]	CC	GG	223357519	1525
M7	[A/T]	AA	TT	223358016	1028
M8	[A/G]	AA	GG	223358667	377
gRNA1				223359044	0
M9	[G/A]	GG	AA	223359433	-389
M10	[C/G]	CC	GG	223359769	-725
M11	[T/C]	TT	CC	223360057	-1013
M12	[C/T]	CC	TT	223360597	-1553
M13	[G/T]	GG	TT	223361075	-2031
M14	[A/G]	AA	GG	223361582	-2538
M15	[C/T]	CC	TT	223362115	-3071
M16	[G/A]	GG	AA	223365381	-6337	173300
M17	[A/G]	AA	GG	223424905	-65861	113776
M18	[G/A]	GG	AA	223466454		72227
M19	[A/G]	AA	GG	223534803		3878
M20	[A/G]	AA	GG	223535415		3266
M21	[A/G]	AA	GG	223535887		2794
M22	[A/G]	AA	GG	223536453		2228
M23	[T/C]	TT	CC	223536747		1934
M24	[A/G]	AA	GG	223538092		589
M25	[G/T]	GG	TT	223538427		254
gRNA2				223538678		0
M26	[G/C]	GG	CC	223538824		-149
M27	[G/A]	GG	AA	223539183		-508
M28	[T/A]	TT	AA	223539340		-665
M29	[G/T]	GG	TT	223539796		-1122
M30	[G/A]	GG	AA	223540710		-2035
M31	[G/A]	GG	AA	223541905		-3230
M32	[T/G]	TT	GG	223543449		-4774
M33	[C/T]	CC	TT	223649253	-290209	-105920
M34	[A/G]	AA	GG	223711552		-170336
